# Supplementary material for: Multiple Gestation as a Risk Factor for SARS-CoV-2-Associated Adverse Maternal Outcome: Data From the COVID-19 Related Obstetric and Neonatal Outcome Study (CRONOS)
Source: PubMed Central journal article supplement — Geburtshilfe Frauenheilkd. 2023 Nov 30;83(12):1508–18. doi: 10.1055/a-2196-6224 (PMC10689107; doi:10.1055/a-2196-6224), 2023-11-30
Supplement: 10-1055-a-2196-6224_21985728.pdf [file 10-1055-a-2196-6224_21985728.pdf]

## Supplementary material

**Supplementary Table S1:** Frequency of different virus variants for unvaccinated and vaccinated women with singleton or multiple pregnancy.

| Virus variant in unvaccinated women | Multiple pregnancies (n=95) | Singleton pregnancies (n=3480) |
|-------------------------------------|-----------------------------|--------------------------------|
| Wild type                           | 39 (41%)                    | 1425 (41%)                     |
| Alpha                               | 19 (20%)                    | 474 (14%)                      |
| Delta                               | 18 (19%)                    | 834 (24%)                      |
| Omicron                             | 19 (20%)                    | 747 (21%)                      |

| Virus variant in vaccinated women | Multiple pregnancies (n=59) | Singleton pregnancies (n= 1550) |
|-----------------------------------|-----------------------------|---------------------------------|
| Wild type                         | 0 (0%)                      | 4 (0%)                          |
| Alpha                             | 0 (0%)                      | 2 (0%)                          |
| Delta                             | 9 (15%)                     | 182 (12%)                       |
| Omicron                           | 50 (85%)                    | 1362 (88%)                      |

**Supplementary Table S2:** Dyspnea due to COVID-19 infection and duration of symptomatic phase according to mother.

| Symptoms                                          | Multiple pregnancies (n= 165 ) | Singleton pregnancies (n=5349) | P-value              |
|---------------------------------------------------|--------------------------------|--------------------------------|----------------------|
| Dyspnea                                           | 38/157 (24%)                   | 1248/5043 (25%)                | 0.88 <sup>chi2</sup> |
| Duration of symptomatic phase according to mother |                                |                                |                      |
| <7 days                                           | 51/131 (40%)                   | 1790/4162 (43%)                | 0.60 <sup>chi2</sup> |
| 7-14 days                                         | 59/131 (45%)                   | 1693/4162 (41%)                |                      |
| >14 days                                          | 19/131 (15%)                   | 679/4162 (16%)                 |                      |

chi2, Pearson's chi-squared test

**Supplementary Table S3:** Multivariate logistic regression analysis results for combined maternal outcome in women with COVID-19 in multiple and singleton pregnancies.

| Combined outcome in multiple pregnancies | Level   | OR   | 95% CI       | P-value |
|------------------------------------------|---------|------|--------------|---------|
| BMI >30 (before pregnancy)               | present | 0.85 | [0.24; 2.62] | 0.78    |
| Gestational age in weeks                 |         | 1.07 | [1.00; 1.14] | 0.05    |
| Maternal age >35                         | present | 0.41 | [0.12; 1.15] | 0.09    |
| Maternal comorbidities                   | present | 0.93 | [0.34; 2.46] | 0.88    |
| Mode of conception                       | ART     | 0.89 | [0.30; 2.46] | 0.83    |
| Smoking (during pregnancy)               | present | 0.00 | [n/a; 4.10]  | 0.99    |

  

| Outcome in singleton pregnancies | Level   | OR   | 95% CI       | P-value |
|----------------------------------|---------|------|--------------|---------|
| BMI >30 (before pregnancy)       | present | 1.56 | [1.26; 1.93] | <0.001  |
| Gestational age in weeks         |         | 1.04 | [1.03; 1.06] | <0.001  |
| Maternal age >35                 | present | 0.91 | [0.74; 1.12] | 0.40    |
| Maternal comorbidities           | present | 0.98 | [0.81; 1.19] | 0.84    |
| Mode of conception               | ART     | 1.01 | [0.60; 1.59] | 0.98    |
| Smoking (during pregnancy)       | present | 0.59 | [0.33; 0.97] | 0.05    |

BMI, body mass index; ART: assisted reproductive technology; OR, odds ratio; CI, confidence interval
